# Supplementary material for: Interannual and decadal variabilities of phytoplankton community in the Bering Sea and the Arctic Ocean: a case study of relationship with ENSO and Arctic Oscillation abnormity
Source: Frontiers journal article supplement (doi:10.3389/feart.2023.1204971), 2023-07-28
Supplement: Data_Sheet_1.XLSX [file Data_Sheet_1.XLSX]

## Sheet: Sheet1
Supplementary Table 1 The locations, characteristics of the El Niño-Southern Oscillation (ENSO) , the Arctic Oscillation (AO), sea surface temperature (SST, °C), salinity, phytoplankton density and community in different years of the Bering Sea and the Arctic Ocean.
Features/sampling times	July and August 1999		July and August, 2010
Locations of study regions	Chukchi Sea and west Arctic Ocean	Bering Sea	Chukchi Sea and west Arctic Ocean	Bering Sea
	66°03′–75°18′N 153°36′–174°59′W	55°59′–60°40′N 173°21′E–175°54′W	67°0′–86°1′N 152°5′–169°0′W	52°42′–60°30′N 169°21′E–179°30′W
ENSO	Strong CP La Niña	Strong CP La Niña	Moderate EP La Niña	Moderate EP La Niña
	Sept. 1998–Jul. 2000	Jul. 1998–Jun. 2000	Jul. 2010–Apr. 2011	Jun. 2010– Mar. 2011
AO	Strong AO with positive phase	Strong AO with positive phase	Strong AO with negative phase	Strong AO with negative phase
	Dec. 1999	Dec. 1999	Dec. 2009–Feb. 2010	Dec. 2009–Feb. 2010
SST (°C)	-	-	3.25 (highest 4):surface water	Shallow water: 0.39; Deep water: 1.71
Salinity	31.26	32.98	30.2	33.43
Phytoplankton density (×104 cell/m3)&	0.16-90680 (9122, the Chukchi Sea)	0.47-1481 (158.0)	25-134194 (8103; the Chukchi Sea)	95-19240 (5872.2)
Proportion of diatoms (%)	99.96	99.4	93.7	98.7
Reference	Yang et al. 2002; Yang and Lin 2006		Lin et al., 2013a, b
& data in brackets were means of phytoplankton density
